# Supplementary material for: From Batch to Continuous Flow Bioprocessing: Use of an Immobilized γ-Glutamyl Transferase from B. subtilis for the Synthesis of Biologically Active Peptide Derivatives
Source: PubMed Central journal article supplement (PMC9614966; doi:10.1021/acs.jafc.2c03702), 2022-09-23
Supplement: jf2c03702_si_001.pdf [file jf2c03702_si_001.pdf]

SUPPORTING INFORMATION  
to the article

**From Batch to Continuous Flow Bioprocessing: Use of an Immobilized  $\gamma$ -Glutamyl Transferase from *B. subtilis* for the Synthesis of Biologically Active Peptide Derivatives**

Marina S. Robescu<sup>a</sup>, Francesca Annunziata<sup>b</sup>, Valeria Somma<sup>c</sup>, Cinzia Calvio<sup>d</sup>, Carlo F. Morelli<sup>c</sup>, Giovanna Speranza<sup>c</sup>, Lucia Tamborini<sup>b</sup>, Daniela Ubiali<sup>a</sup>, Andrea Pinto<sup>e\*</sup>, Teodora Bavaro<sup>a\*</sup>

<sup>a</sup> Department of Drug Sciences, University of Pavia, viale Taramelli 12, Pavia, Italy

<sup>b</sup> Department of Pharmaceutical Sciences, University of Milano, via Mangiagalli 25, Milano, Italy

<sup>c</sup> Department of Chemistry, University of Milano, via Golgi 19, Milano, Italy

<sup>d</sup> Department of Biology and Biotechnology "L. Spallanzani", University of Pavia, via Ferrata 1, Pavia, Italy

<sup>e</sup> Department of Food, Environmental and Nutritional Sciences, University of Milano, via Celoria 2, Milano, Italy

\*Corresponding authors: [teodora.bavaro@unipv.it](mailto:teodora.bavaro@unipv.it)

[andrea.pinto@unimi.it](mailto:andrea.pinto@unimi.it)

## Table of contents

### Supplementary Figures

|                                                                                                                  |   |
|------------------------------------------------------------------------------------------------------------------|---|
| Figure S1. Shelf-life of <i>BsGGT</i> -GLX-AG under storage (4 °C)                                               | 1 |
| Figure S2. Preparative synthesis of $\gamma$ -E-methionine ( <b>1</b> ) at the 3 hours endpoint                  | 2 |
| Figure S3. Preparative synthesis of $\gamma$ -E-( <i>S</i> )-allyl-cysteine ( <b>2</b> ) at the 3 hours endpoint | 2 |
| Figure S4. Preparative synthesis of $\gamma$ -E-aurine ( <b>3</b> ) at the 24 hours endpoint                     | 3 |
| Figure S5. Preparative synthesis of ophthalmic acid ( <b>4</b> ) at the 3 hours endpoint                         | 3 |

### Supplementary Tables

|                                                                                                              |   |
|--------------------------------------------------------------------------------------------------------------|---|
| Table S1. In-flow synthesis of $\gamma$ -E-( <i>S</i> )-allyl-Cys ( <b>2</b> ): study of reaction parameters | 4 |
|--------------------------------------------------------------------------------------------------------------|---|

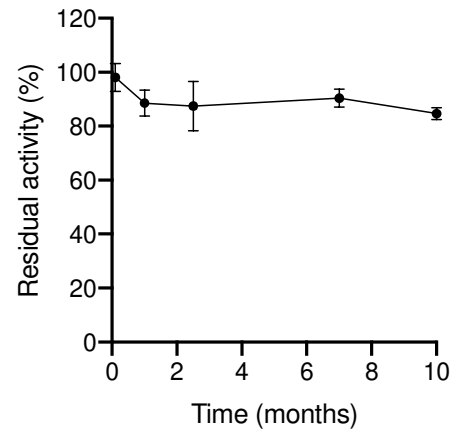

**Figure S1.** Shelf-life of *BsGGT-GLX-AG* under storage (4 °C).

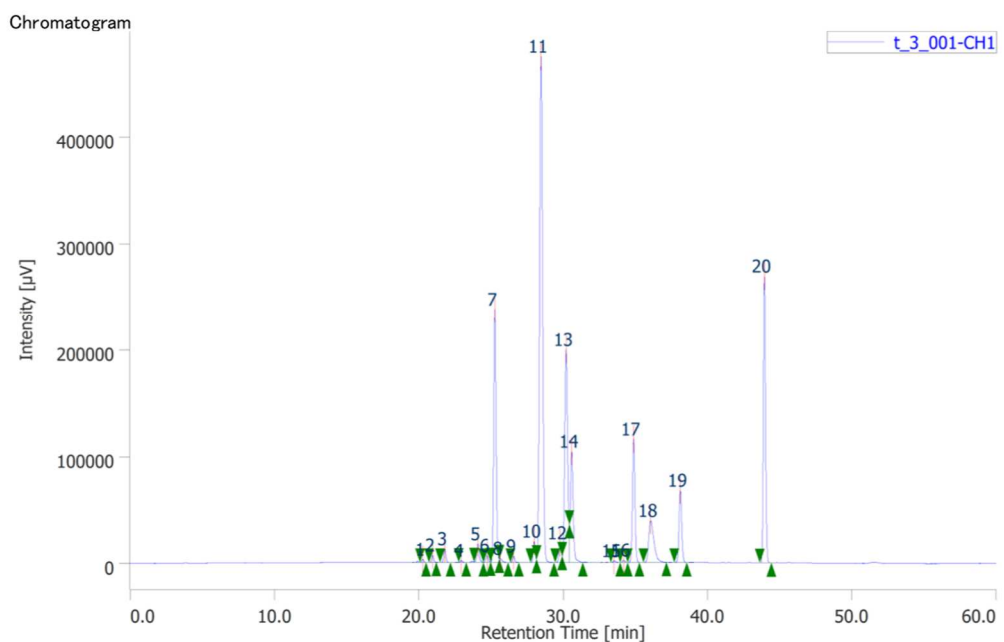

**Figure S2.** Preparative synthesis of  $\gamma$ -E-methionine (**1**) at the 3 hours endpoint. 1=  $\gamma$ -E<sub>3</sub>-Gln; 2=  $\gamma$ -E<sub>2</sub>-Gln; 3=  $\gamma$ -E-Gln; 5= Gln; 7= serine (internal standard); 11= excess of Sanger's reagent; 12 = glutamic acid; 13= ammonia; 14= derivatization artifact; 17=  $\gamma$ -E-methionine (**1**); 18 & 19= derivatization artifacts; 20= methionine.

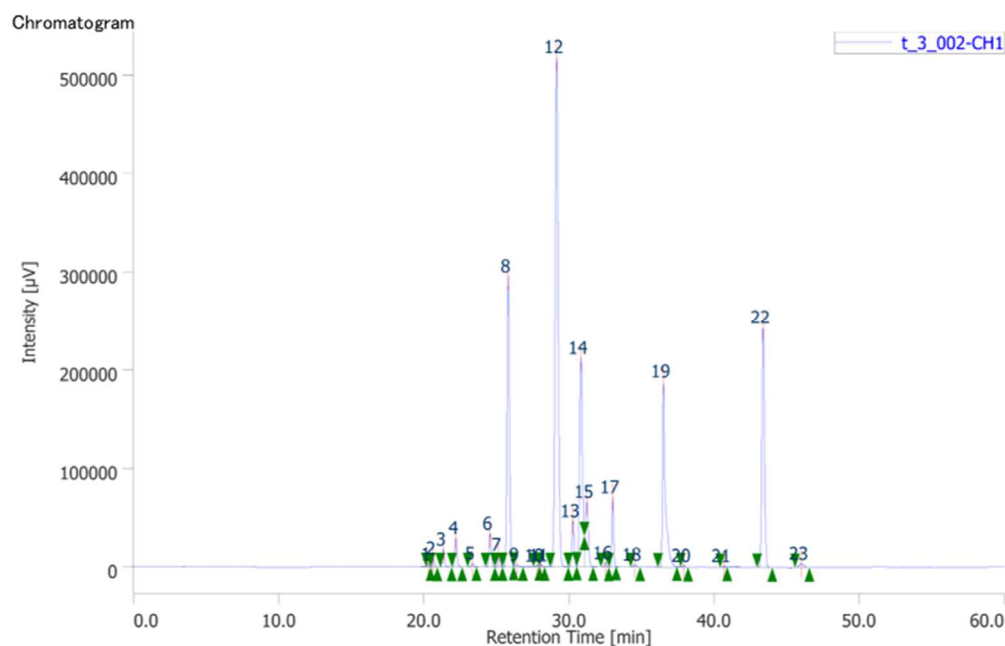

**Figure S3.** Preparative synthesis of  $\gamma$ -E-(S)-allyl-cysteine (**2**) at the 3 hours endpoint. 2=  $\gamma$ -E<sub>3</sub>-Gln; 3=  $\gamma$ -E<sub>2</sub>-Gln; 4=  $\gamma$ -E-Gln; 6= Gln; 8= serine (internal standard); 12= excess of Sanger's reagent; 13= glutamic acid; 14= ammonia; 15= derivatization artifact; 17=  $\gamma$ -E<sub>2</sub>-(S)-allyl-cysteine; 19=  $\gamma$ -E-(S)-allyl-cysteine (**2**) (overlaps with the peak of a derivatization artifact; the conversion of **2** was corrected taking into account the peak area of the derivatization artifact); 22= (S)-allyl-cysteine.

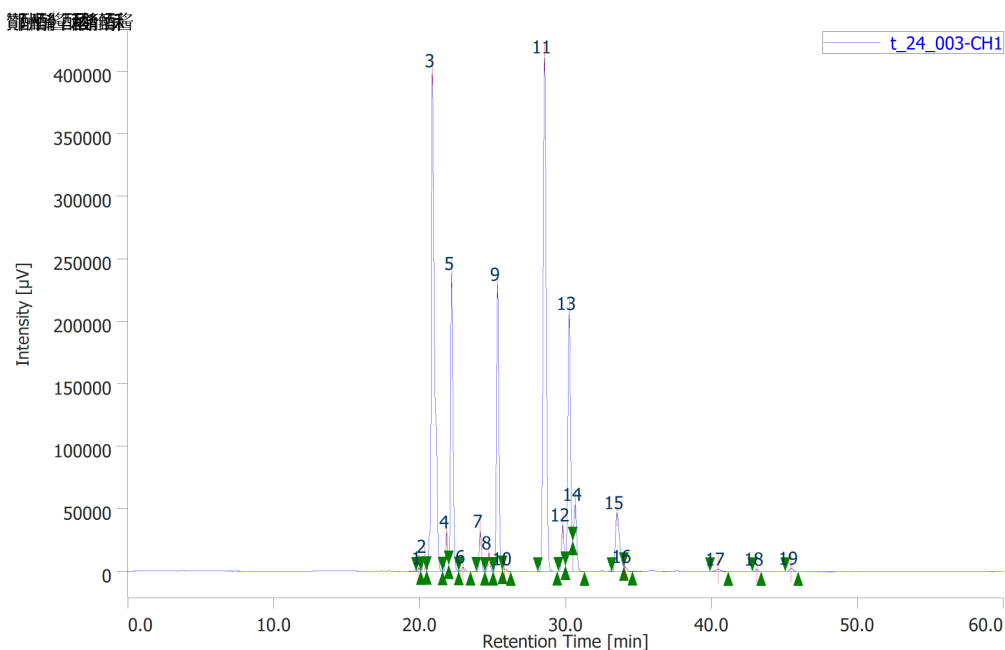

**Figure S4.** Preparative synthesis of  $\gamma$ -E-**3** at the 24 hours endpoint. 3= taurine; 4=  $\gamma$ -E-Gln; 5= $\gamma$ -E-**4**); 7= Gln; 9= serine (internal standard); 11= excess of Sanger's reagent; 12= glutamic acid; 13= ammonia; 14 and 15= derivatization artifacts.

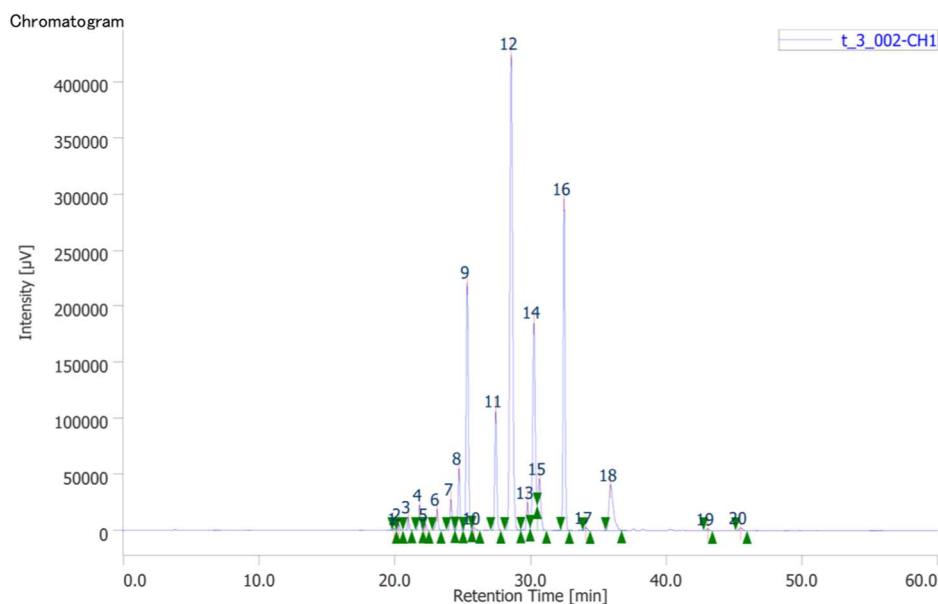

**Figure S5.** Preparative synthesis of ophthalmic acid (**4**) at the 3 hours endpoint. 2=  $\gamma$ -E<sub>3</sub>-Gln; 3=  $\gamma$ -E<sub>2</sub>-Gln; 4=  $\gamma$ -E-Gln; 6= putative  $\gamma$ -E<sub>3</sub>-AbuGly; 7= Gln; 8= putative  $\gamma$ -E<sub>2</sub>-AbuGly; 9= serine (internal standard); 11= ophthalmic acid ( $\gamma$ -E-AbuGly, **3**); 12= excess of Sanger's reagent; 13= glutamic acid; 14= ammonia; 15= derivatization artifact; 16= AbuGly; 18= derivatization artifact.

**Table S1.** In-flow synthesis of  $\gamma$ -E-(S)-allyl-Cys (**2**): study of reaction parameters.

| Entry          | [L-Gln] <sup>a</sup><br>(mM) | [SAC] <sup>a</sup><br>(mM) | Res. time<br>(min) | T<br>(°C) | P<br>(bar) | Gln<br>(%) | $\gamma$ -E-SAC (2)<br>(%) | Glu<br>(%) | $\gamma$ -EE-SAC<br>(%) | $\gamma$ -EEE-SAC<br>(%) | $\gamma$ -E-Gln<br>(%) | $\gamma$ -EE-Gln<br>(%) | $\gamma$ -EEE-Gln<br>(%) | $\gamma$ -E-Glu<br>(%) |
|----------------|------------------------------|----------------------------|--------------------|-----------|------------|------------|----------------------------|------------|-------------------------|--------------------------|------------------------|-------------------------|--------------------------|------------------------|
| <b>Batch 1</b> | 100                          | 100                        | 180                | 25        | atm        | 6.4        | 30.2                       | 9.1        | 12.6                    | 0.7                      | 5.3                    | 2.5                     | 1.0                      | 2.4                    |
| <b>Batch 2</b> | 100                          | 300                        | 180                | 25        | atm        | 4.2        | 48.4                       | 12.7       | 8.9                     | 2.2                      | 2.8                    | 0.6                     | 0                        | 1.6                    |
| <b>1</b>       | 100                          | 100                        | 15                 | 25        | atm        | 1.4        | 18.5                       | 58.0       | 4.6                     | 0                        | 1.4                    | 0                       | 0                        | 5.0                    |
| <b>2</b>       | 100                          | 100                        | 30                 | 25        | atm        | 0          | 11.0                       | 82.2       | 0                       | 0                        | 0                      | 0                       | 0                        | 3.4                    |
| <b>3</b>       | 100                          | 100                        | 60                 | 25        | atm        | 0          | 4.6                        | 87.4       | 0                       | 0                        | 2.2                    | 0                       | 0                        | 1.8                    |
| <b>4</b>       | 100                          | 100                        | 30                 | 30        | atm        | 0          | 9.5                        | 78.9       | 0                       | 0                        | 2.4                    | 0                       | 0                        | 3.4                    |
| <b>5</b>       | 100                          | 100                        | 15                 | 30        | atm        | 2.4        | 28.1                       | 32.8       | 6.9                     | 2.3                      | 1.8                    | 1.0                     | 0                        | 4.8                    |
| <b>6</b>       | 100                          | 100                        | 5                  | 30        | atm        | 10.5       | 29.2                       | 18.4       | 8.3                     | 1.5                      | 5.4                    | 1.8                     | 0                        | 2.4                    |
| <b>7</b>       | 100                          | 100                        | 5                  | 25        | atm        | 15.1       | 30.5                       | 11.1       | 6.9                     | 1.7                      | 7.5                    | 1.8                     | 0                        | 2.1                    |
| <b>8</b>       | 100                          | 100                        | 2                  | 25        | atm        | 38.1       | 19.8                       | 4.5        | 3.6                     | 0.9                      | 11.2                   | 1.8                     | 0                        | 0                      |
| <b>9</b>       | 100                          | 100                        | 5                  | 37        | atm        | 11.2       | 26.8                       | 21.4       | 7.6                     | 1.4                      | 5.3                    | 1.7                     | 0                        | 2.7                    |
| <b>10</b>      | 100                          | 100                        | 15                 | 37        | atm        | 1.7        | 21.3                       | 47.4       | 4.6                     | 1.7                      | 0.8                    | 1.5                     | 0                        | 4.7                    |
| <b>11</b>      | 100                          | 100                        | 5                  | 25        | 8          | 8.7        | 32.5                       | 24.1       | 8.8                     | 0                        | 5.6                    | 0                       | 0                        | 3.0                    |
| <b>12</b>      | 200                          | 200                        | 5                  | 25        | atm        | 22.1       | 22.5                       | 10.3       | 5.4                     | 1.6                      | 9.9                    | 2.4                     | 0                        | 1.4                    |
| <b>13</b>      | 200                          | 200                        | 15                 | 25        | atm        | 3.6        | 30.4                       | 31.3       | 8.4                     | 0                        | 3.4                    | 1.2                     | 0.5                      | 1.5                    |
| <b>14</b>      | 100                          | 50                         | 5                  | 25        | atm        | 13.2       | 15.2                       | 18.8       | 5.5                     | 0                        | 9.4                    | 3.9                     | 1.2                      | 3.2                    |
| <b>15</b>      | 150                          | 50                         | 5                  | 25        | atm        | 22         | 9.9                        | 8.3        | 3.3                     | 0.7                      | 14.1                   | 5.1                     | 1.2                      | 1.4                    |
| <b>16</b>      | 200                          | 200                        | 5                  | 25        | 8          | 1          | 24.2                       | 15.2       | 7.2                     | 0                        | 9.1                    | 3.0                     | 0                        | 2.5                    |
| <b>17</b>      | 200                          | 200                        | 5                  | 25        | 16         | 17.6       | 26.2                       | 12.4       | 7.7                     | 0                        | 8.3                    | 2.7                     | 0                        | 1.9                    |
| <b>18</b>      | 400                          | 200                        | 5                  | 25        | 8          | 27         | 15.3                       | 6.5        | 4.1                     | 0                        | 13.3                   | 3.8                     | 0.8                      | 0.8                    |
| <b>19</b>      | 400                          | 200                        | 5                  | 25        | atm        | 23.7       | 17.3                       | 8.4        | 4.2                     | 0                        | 12.2                   | 3.8                     | 0.9                      | 1.4                    |
| <b>20</b>      | 100                          | 200                        | 5                  | 25        | atm        | 8.3        | 35.0                       | 17.2       | 9.1                     | 1.0                      | 4.5                    | 1.4                     | 0.3                      | 2.0                    |
| <b>21</b>      | 100                          | 200                        | 15                 | 25        | atm        | 1.9        | 35.0                       | 33.6       | 8.0                     | 0.9                      | 1.4                    | 0.4                     | 0                        | 3.4                    |
| <b>22</b>      | 100                          | 200                        | 5                  | 25        | 8          | 6.2        | 32.9                       | 20.5       | 8.2                     | 1.1                      | 6.1                    | 1.1                     | 0                        | 2.4                    |
| <b>23</b>      | 100                          | 300                        | 5                  | 25        | atm        | 12.9       | 45.2                       | 11.6       | 6.5                     | 1.1                      | 4.7                    | 0.8                     | 0                        | 1.1                    |
| <b>24</b>      | 100                          | 300                        | 15                 | 25        | atm        | 1.7        | 40.6                       | 31.6       | 7.4                     | 1.4                      | 1.2                    | 0                       | 0                        | 2.3                    |
| <b>25</b>      | 100                          | 300                        | 5                  | 25        | 8          | 9.6        | 38.0                       | 15.3       | 8.5                     | 1.2                      | 4.6                    | 1.3                     | 0                        | 1.6                    |

<sup>a</sup> [L-Gln] and [SAC] resulting after mixing in the T-piece.
